# Supplementary material for: Co-Localization of Resistance and Metabolic Quantitative Trait Loci on Carrot Genome Reveals Fungitoxic Terpenes and Related Candidate Genes Associated with the Resistance to Alternaria dauci
Source: MDPI journal article supplement (doi:10.3390/metabo13010071), 2023-01-02
Supplement: s1 [file s1]

**Table S2.** List of all terpenes per family

| Code  | Full name                    | Family  | Sub-family    |
|-------|------------------------------|---------|---------------|
| aPi   | $\alpha$ -Pinene             | Terpene | Monoterpene   |
| Camp  | Camphene                     | Terpene | Monoterpene   |
| bPi   | $\beta$ -Pinene              | Terpene | Monoterpene   |
| Sab   | Sabinene                     | Terpene | Monoterpene   |
| bMyr  | $\beta$ -Myrcene             | Terpene | Monoterpene   |
| Lim   | Limonene                     | Terpene | Monoterpene   |
| bPhe  | $\beta$ -Phellandrene        | Terpene | Monoterpene   |
| ZbOc  | (Z)- $\beta$ -Ocimene        | Terpene | Monoterpene   |
| gTer  | $\gamma$ -Terpinene          | Terpene | Monoterpene   |
| EbOc  | (E)- $\beta$ -Ocimene        | Terpene | Monoterpene   |
| pCy   | p-Cymene                     | Terpene | Monoterpene   |
| aTer  | $\alpha$ -Terpinolene        | Terpene | Monoterpene   |
| cRo   | cis-Rose oxide               | Terpene | Monoterpene   |
| Lin   | Linalol                      | Terpene | Monoterpene   |
| Bac   | Bornyl acetate               | Terpene | Monoterpene   |
| aCop  | $\alpha$ -Copaene            | Terpene | Sesquiterpene |
| bCub  | $\beta$ -Cubebene            | Terpene | Sesquiterpene |
| caBer | cis- $\alpha$ -Bergamotene   | Terpene | Sesquiterpene |
| taBer | trans- $\alpha$ -Bergamotene | Terpene | Sesquiterpene |
| Cary  | Caryophyllene                | Terpene | Sesquiterpene |
| cbFar | cis- $\beta$ -Farnesene      | Terpene | Sesquiterpene |
| aHum  | $\alpha$ -Humulene           | Terpene | Sesquiterpene |
| tbFar | trans- $\beta$ -Farnesene    | Terpene | Sesquiterpene |
| aAmo  | $\alpha$ -Amorphene          | Terpene | Sesquiterpene |
| GerD  | Germacrene D                 | Terpene | Sesquiterpene |
| bSel  | $\beta$ -Selinene            | Terpene | Sesquiterpene |
| bBis  | $\beta$ -Bisabolene          | Terpene | Sesquiterpene |
| EaFar | (E-E)- $\alpha$ -Farnesene   | Terpene | Sesquiterpene |
| dCad  | $\delta$ -Cadinene           | Terpene | Sesquiterpene |
| aBis  | $\alpha$ -Bisabolene         | Terpene | Sesquiterpene |
