# Supplementary material for: Co-Localization of Resistance and Metabolic Quantitative Trait Loci on Carrot Genome Reveals Fungitoxic Terpenes and Related Candidate Genes Associated with the Resistance to Alternaria dauci
Source: MDPI journal article supplement (doi:10.3390/metabo13010071), 2023-01-02
Supplement: s1 [file s1]

|            | CONTROL                                                                            | $\alpha$ -PINENE                                                                   | CAMPHERE                                                                            |
|------------|------------------------------------------------------------------------------------|------------------------------------------------------------------------------------|-------------------------------------------------------------------------------------|
| EXP. 1 4H  |   |   |                                                                                     |
| EXP. 1 4H  |   |                                                                                    |   |
| EXP. 2 70H |   |   |   |
| EXP. 3 70H |  |  |  |

**Figure S3.** Evaluation of the inhibitory effect of  $\alpha$ -pinene and camphene (7.34mM) on germination of *Alternaria dauci* P2 strain after 4 and 70 hours of incubation. Bar = 10  $\mu$ m
