# Supplementary material for: Co-Localization of Resistance and Metabolic Quantitative Trait Loci on Carrot Genome Reveals Fungitoxic Terpenes and Related Candidate Genes Associated with the Resistance to Alternaria dauci
Source: MDPI journal article supplement (doi:10.3390/metabo13010071), 2023-01-02
Supplement: s1 [file s1]

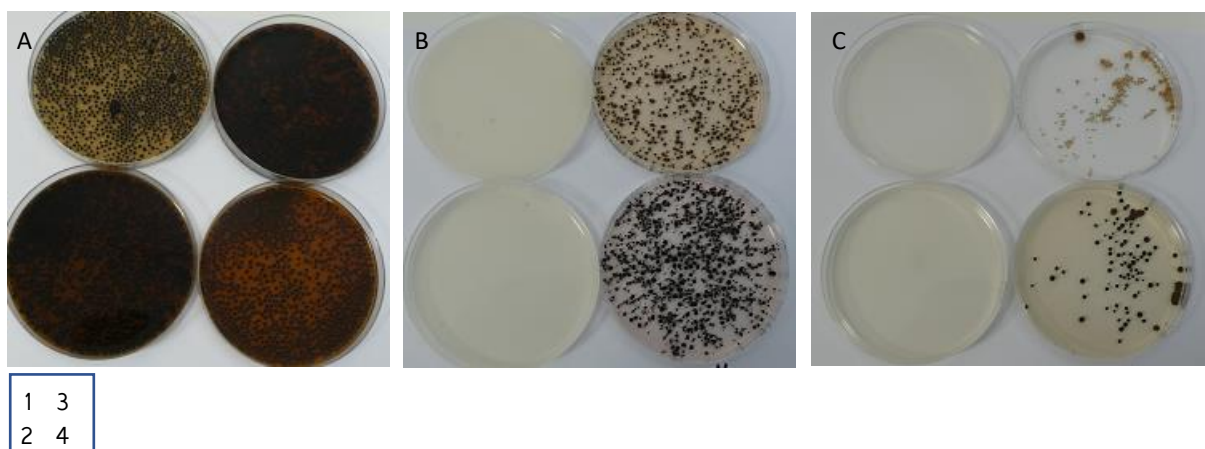

**Figure S4.** Evaluation of the inhibitory effect of  $\alpha$ -pinene and camphene on growth of *Alternaria dauci* P2 strain after 8 days of incubation. Four concentrations of each terpene were tested 1: 14.6mM, 2: 7.34mM, 3: 1.47mM, 4: 0.73mM. A: control; B:  $\alpha$ - pinene, C: camphene
