# Supplementary material for: Co-Localization of Resistance and Metabolic Quantitative Trait Loci on Carrot Genome Reveals Fungitoxic Terpenes and Related Candidate Genes Associated with the Resistance to Alternaria dauci
Source: MDPI journal article supplement (doi:10.3390/metabo13010071), 2023-01-02
Supplement: s1 [file s1]

**Table S1.** List of quantitative resistance loci (rQTL) detected by connected analysis. (SI = Support Interval; Chr = Chromosome; RL= Resistance Loci; R<sup>2</sup> = Explained phenotypic variation; cM = centimorgan)

| Scoring year | Code of rQTL | Chr | 1.5-LOD SI (cM) | 1-LOD SI (cM) | Max position (cM) | R <sup>2</sup> (%) | Global R <sup>2</sup> (%) | Additive effect of allele |        |        |
|--------------|--------------|-----|-----------------|---------------|-------------------|--------------------|---------------------------|---------------------------|--------|--------|
|              |              |     |                 |               |                   |                    |                           | H1                        | I2     | K3     |
| 2011         | RL11         | 1   | 30.4 – 50.4     | 31.7 – 48     | 39.6              | 7                  | 43                        | 0.205                     | 0.053  | -0.259 |
|              |              | 2   | 9.6 – 21.4      | 7.7 – 23.7    | 13.7              | 8                  |                           | -0.203                    | 0.204  | -0.001 |
|              |              | 3   | 0 – 15.1        | 0 – 12.7      | 5                 | 12.4               |                           | 0.267                     | -0.374 | 0.107  |
|              |              | 4   | 44.1 – 58.7     | 45.2 – 50.7   | 47.7              | 13.9               |                           | 0.106                     | 0.347  | -0.453 |
|              |              | 6   | 29.6 – 33.1     | 29.7 – 32.5   | 32.1              | 21.6               |                           | 0.336                     | -0.017 | -0.318 |
| 2014         | RL14         | 1   | 47.6 - 63.1     | 49.4 – 61.6   | 54.4              | 11.7               | 58                        | 0.249                     | -0.171 | -0.078 |
|              |              | 2   | 8.4 - 35.6      | 9.7 - 22.3    | 13.7              | 13.4               |                           | -0.277                    | 0.249  | 0.027  |
|              |              | 3   | 0 - 15.9        | 0.5 - 15      | 10                | 12.5               |                           | 0.262                     | -0.450 | 0.187  |
|              |              | 3   | 41.7 -50.9      | 42.4 - 49.4   | 43.8              | 6.5                |                           | 0.203                     | -0.046 | -0.157 |
|              |              | 4   | 1.1 - 29.1      | 2.5 - 14.2    | 8.3               | 11.2               |                           | 0.0983                    | 0.287  | -0.385 |
|              |              | 5   | 52.3 – 72       | 55.2 – 72     | 68.3              | 10                 |                           | -0.248                    | 0.290  | -0.043 |
|              |              | 6   | 25.5 - 40.9     | 26 - 40.5     | 27.7              | 20.2               |                           | 0.309                     | 0.034  | -0.343 |
|              |              | 8   | 14.4 - 31.9     | 17.8 – 31.9   | 31.4              | 8.5                |                           | 0.006                     | -0.336 | 0.329  |
| 2016         | RL16         | 1   | 31.3 - 63.9     | 34.1 - 51.3   | 39.6              | 7.3                | 24                        | 0.246                     | -0.278 | 0.031  |
|              |              | 2   | 1.8 - 42.7      | 4.7 - 23.6    | 18.1              | 7                  |                           | -0.182                    | 0.479  | -0.298 |
|              |              | 3   | 12.6 - 47.6     | 19.1 - 46.3   | 43.8              | 7.4                |                           | 0.245                     | -0.078 | -0.167 |
|              |              | 6   | 27.6 - 47.3     | 31.6 - 47.3   | 47.2              | 6                  |                           | 0.163                     | 0.124  | -0.287 |
